# Supplementary material
Source: PubMed Central journal article supplement (PMC2929369)
Supplement: NIHMS190061-supplement-01.pdf [file NIHMS190061-supplement-01.pdf]

## **ONLINE SUPPLEMENT**

### **WHOLE GRAPE INTAKE IMPACTS CARDIAC PPAR AND NF- $\kappa$ B ACTIVITY AND CYTOKINE EXPRESSION IN RATS WITH DIASTOLIC DYSFUNCTION**

#### **Authors:**

E Mitchell Seymour<sup>\*,†</sup>

Maurice R. Bennink<sup>†</sup>

Stephanie W. Watts<sup>††</sup>

Steven F. Bolling<sup>\*</sup>

*\* University of Michigan Cardiovascular Center, Dept. of Surgery, Ann Arbor, MI 48109*

*† Michigan State University, Dept. of Food Science and Human Nutrition, East Lansing, MI 48824*

*†† Michigan State University, Dept. of Pharmacology and Toxicology, East Lansing, MI 48824*

#### **Address for Correspondence:**

E Mitchell Seymour, PhD

B558 MSRB2 0686

1150 W. Medical Center Drive

Ann Arbor, MI 48109

(734) 763-0331

(734) 763-0323

[mitchell.seymour@gmail.com](mailto:mitchell.seymour@gmail.com)

### **Cardiac Sub-Cellular Fractionation**

Frozen cardiac fragments were powdered using a mortar and pestle cooled by a cocoon of dry ice. The powder was then added to kit buffer cytoplasmic extraction reagent I (CER I) at 50 mg powder/ml CER I buffer, and subjected to four, 10-second, low speed pulses of a Brinkmann Polytron homogenizer (Kinematica, Bohemia, NY). The resulting homogenate was incubated on ice for ten minutes, followed by the addition of cytoplasmic extraction reagent Buffer II (CERII, 55 ul/ml of CER I buffer volume). The sample was briefly vortexed and centrifuged for five minutes at 14,000 x g (at 4°C). The resulting supernatant was considered the cytosolic fraction. The pellet was then resuspended in the nuclear extraction reagent (NER, 500ul/ml of CER I buffer volume), and incubated on ice for a total of 40 minutes with brief vortexing (10 seconds) at 10-minute intervals. The sample was then centrifuged for 10 minutes at 16,000 x g (at 4°C). The resulting supernatant was considered the nuclear fraction.

Nuclear and cytosolic fractions (50 µg each) were mixed with SDS sample buffer, denatured for 5 minutes at 95°C, then resolved on pre-cast NuPAGE™ 10% Bis-Tris polyacrylamide gels (Invitrogen, Carlsbad, CA, USA) by electrophoresis using a Novex Mini-Cell (Invitrogen), and subsequently transferred onto PVDF membranes. Blocking and antibody incubation steps were accomplished using the vacuum-based, SNAP i.d. Protein Detection System (Millipore, Billerica, MA, USA) using the ECL-specific blocking reagents and ECL-chemiluminescence detection system (GE Healthcare, Piscataway, NJ, USA). Successful fractionation was verified by immunodetection of  $\alpha$ -tubulin (1° antibody 1:1000) and lamin B (1° antibody 1:200) for cytosolic and nuclear fractions, respectively. Membranes were exposed to CL-XPosure film (Pierce, Rockford, IL, USA) and band densities were analyzed using UN-SCAN-IT Gel software version 6.1 (Silk Scientific, Orem, UT, USA).

### **Cardiac Hydroxyproline**

Frozen left ventricle tissue was homogenized in ice-cold phosphate-buffered saline containing a Complete Protease Inhibitor Mini-Tab cocktail (Roche, Indianapolis, IN). The tissue was homogenized with a 30 second pulse of a Polytron (Brinkmann) tissue homogenizer and hydrolysis of the sample solution was carried out with 6 N HCl at 100°C for 24 hours. The hydrolyzed samples were dried under a stream of nitrogen. Hydroxyproline standard solutions were prepared in a range from 2.0-10.0 µg/mL, and 0.5 mL of each standard and cardiac homogenates were placed in glass tubes with 1.0 mL of isopropanol and vortexed. To this solution, 0.5 mL of oxidant (0.35 g chloramine T in 5.0 mL water and 20.0 mL citrate buffer) was added, vortexed, and allowed to stand at room temperature for 4 minutes. Next, 3.25 mL of Ehrlich's reagent (3.0 mL Ehrlich's reagent in 15.0 mL isopropanol) was added, and the tubes were kept at 25°C for 18 hours. The intensity of red coloration was measured using a spectrophotometer at 560nm.

**Table S1.** Diets and estimated nutrient content

|                    | <b>LS</b>        | <b>LSG</b>       | <b>HS</b>        | <b>HSG</b>       | <b>HSH</b>       |
|--------------------|------------------|------------------|------------------|------------------|------------------|
| Total Protein      | 20               | 21               | 20               | 21               | 20               |
| Total Carb         | 68               | 68               | 68               | 68               | 68               |
| Total Fat          | 5                | 5                | 5                | 5                | 5                |
| Total Fiber        | 5                | 5                | 5                | 5                | 5                |
| kcal/gram of diet  | 3.9              | 4                | 3.9              | 4                | 3.9              |
|                    | <b>g/kg diet</b> |
| Casein             | 198              | 198              | 198              | 198              | 198              |
| Protein from Grape | 0                | 1.1              | 0                | 1.1              | 0                |
| Corn Starch        | 150              | 150              | 150              | 150              | 150              |
| Sucrose            | 500              | 500              | 500              | 500              | 500              |
| Sugar from Grape   | 0                | 27.7             | 0                | 27.7             | 0                |
| Dextrose           | 14               | 0                | 14               | 0                | 14               |
| Fructose           | 14               | 0                | 14               | 0                | 14               |
| Cellulose          | 50               | 50               | 50               | 50               | 50               |
| Fiber from Grape   | 0                | 0.02             | 0                | 0.02             | 0                |
| Corn Oil           | 50               | 50               | 50               | 50               | 50               |
| AIN76a Vitamin Mix | 10               | 10               | 10               | 10               | 10               |
| AIN76a Mineral Mix | 35               | 35               | 35               | 35               | 35               |
| Vitamin C (Grape)  | 0                | 0.001            | 0                | 0.001            | 0                |
| Potassium (Grape)  |                  | 0.3              | 0                | 0.3              | 0                |
| Vitamin A (Grape)  | 0                | 99.6 IU          | 0                | 99.6 IU          | 0                |

Nutrient content of grape powder was analyzed by National Food Laboratory, Inc. (Dublin, CA) Nutrient content of the base AIN76a diet was provided by Research Diets, Inc.

**Table S2.** Grape Powder Phytochemical Analysis

---

---

| <b>Grape Powder Analysis</b> |          |
|------------------------------|----------|
| (per kg of grape powder)     |          |
| <b>Anthocyanins</b>          |          |
| Cyanidin                     | 380.0 mg |
| Malvidin                     | 170.3 mg |
| Peonidin                     | 33.5 mg  |
| <b>Monomeric Flavanols</b>   |          |
| Catechin                     | 19.1 mg  |
| Epicatechin                  | 12.5 mg  |
| <b>Flavonols</b>             |          |
| Quercetin                    | 49 mg    |
| Kaempferol                   | 5.7 mg   |
| Isorhamnetin                 | 4.4 mg   |
| <b>Stilbenes</b>             |          |
| Resveratrol                  | 3.60 mg  |

---

Phytochemical Analysis (per kg of grape powder)  
by National Food Laboratories, Inc.

**Table S3. Cardiac Hypertrophy, Fibrosis, and Echocardiography-Determined Cardiac Geometry and Function**

| <b>Endpoints</b>         | <b>LS</b> | <b>LSG</b> | <b>HS</b> | <b>HSG</b>             | <b>HSH</b> |
|--------------------------|-----------|------------|-----------|------------------------|------------|
| <b>% Change BW</b>       | 379.1±13  | 381.2±15   | 336.5±11* | 354.5±10 <sup>†</sup>  | 339.6±14*  |
| <b>Heart W / TL</b>      | 0.34±0.01 | 0.33±0.02  | 0.42±0.1* | 0.32±0.01              | 0.43±0.3*  |
| <b>Hydroxyproline</b>    | 5.2±0.3   | 5.1±0.2    | 9.2±0.2*  | 7.4±0.3 <sup>†</sup>   | 9.1±0.3*   |
| <b>RW th</b>             | 0.4±0.02  | 0.4±0.03   | 0.7±0.02* | 0.5±0.03               | 0.8±0.03*  |
| <b>IVRT</b>              | 21.1±2    | 20.4±3     | 31.5±3*   | 24.3±1 <sup>†</sup>    | 30.1±3*    |
| <b>E/A</b>               | 2.6±0.3   | 2.5±0.1    | 6.2 ±0.3* | 3.8 ±0.13 <sup>†</sup> | 5.8 ±0.3*  |
| <b>% Eject. Fraction</b> | 72.1±4    | 72.1±4     | 70.1±4    | 71.1±5                 | 70.4±5     |
| <b>Cardiac Index</b>     | 437±22    | 436±19     | 333±26*   | 375±21 <sup>†</sup>    | 339±23*    |

Groups include LS, low-salt diet; LSG, low salt + grape powder diet; HS, high-salt diet; HSH, high salt diet + hydralazine; HSG, high salt + grape powder diet. % Change Body Weight (BW) from final day to day zero. HW (g heart weight) relative to tibial length (TL) in centimeters. Hydroxyproline as milligrams/grams of total protein. Echocardiography measures after 18 weeks of diet. RW th (relative wall thickness, mm), IVRT (Isovolumetric Relaxation Time), E/A (E Wave to A wave, % Eject. Fraction (% Eject. Fraction). Cardiac index is ml of blood/pumped per minute/g body weight. Data presented as mean ± SEM, *n* = 12 per group.\*at least *p* < 0.05 vs. LS and LSG. <sup>†</sup>*p* < 0.05 vs. LS, LSG, HS.

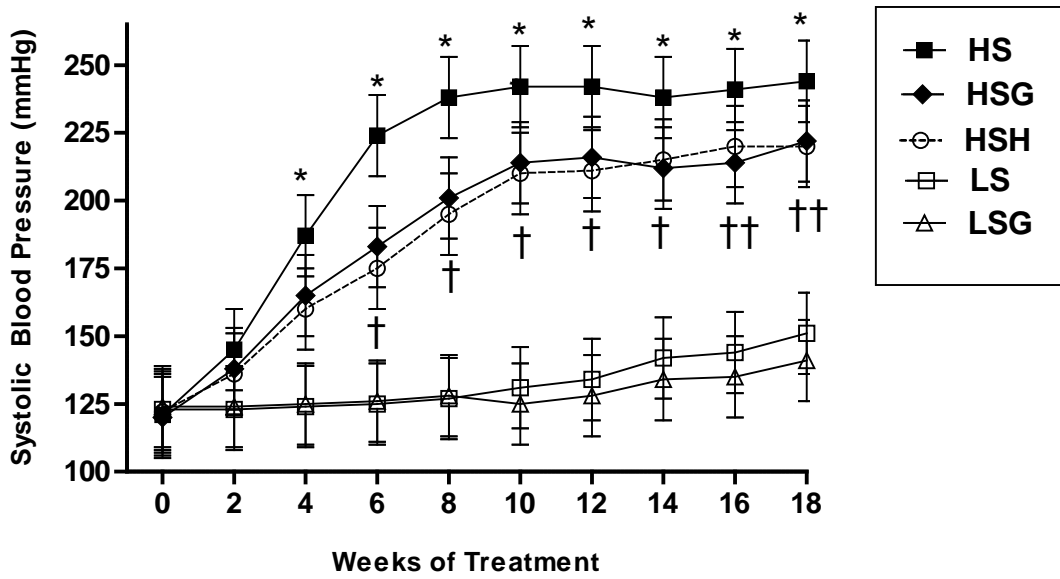

**Figure S1. Systolic blood pressure.** Mean  $\pm$  SEM,  $n = 12$  per group. \* At least  $p < 0.05$  vs. low salt (LS) and low salt grape (LSG) group; † at least  $p < 0.05$  vs. HS for both HSH and HSG groups; ‡ at least  $p < 0.05$  vs. HS, for HSG group only. (LS) low-salt diet; (LSG) low salt + grape powder diet; (HS) high-salt diet; (HSH) high salt diet + hydralazine; (HSG) high salt + grape powder diet.
